# Supplementary material
Source: Springer Nature journal article supplement (https://www.springermedizin.de/resource/supplementary/10194_2013_585_MOESM2_ESM.pdf/9422724)

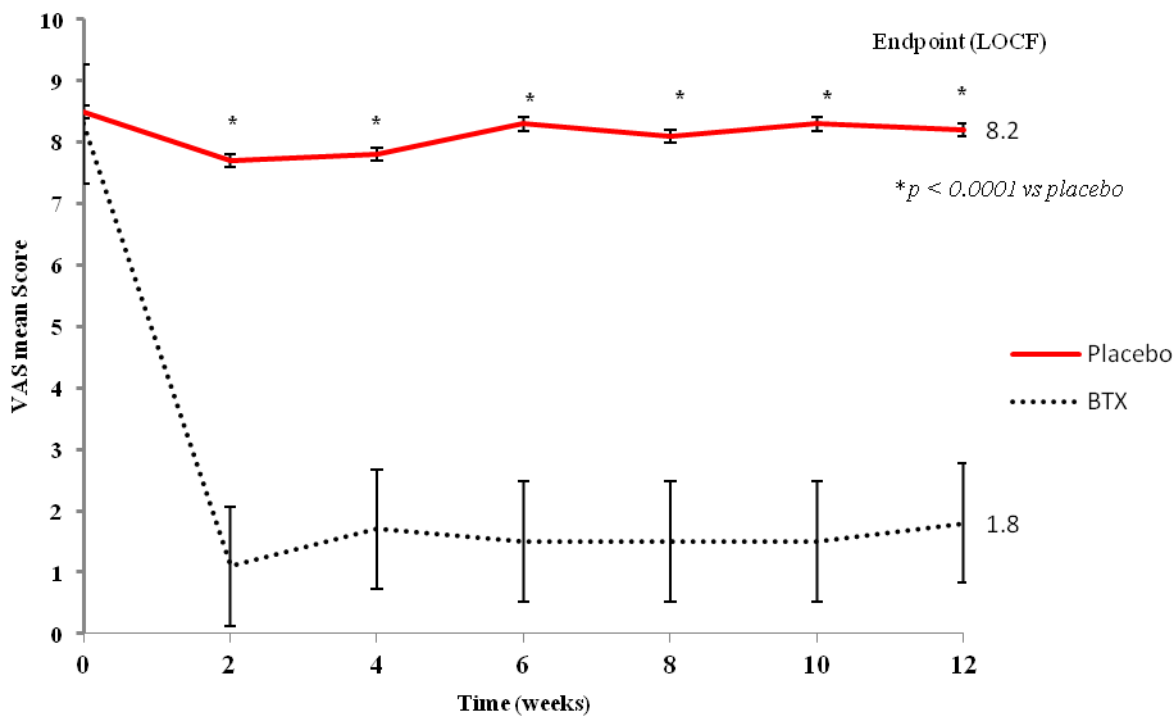

Supplement: MOESM2 [file 9422724]
